# Supplementary material for: Transcriptomic Changes Induced by Low and High Concentrations of Heavy Metal Exposure in Ulva pertusa
Source: MDPI journal article supplement (doi:10.3390/toxics11070549), 2023-06-22
Supplement: s1 [file s1]

**Table S1.** Marine ecosystem protection standards of Republic of Korea for determining heavy metal treatment concentration. In the experiment, the values expressed in bold letters was chosen as MPS treatment group.

| (Unit : $\mu\text{g/L}$ ) | <b>Cu</b> | <b>Pb</b> | <b>Zn</b> | <b>As</b> | <b>Cd</b> | <b>Cr<sub>6+</sub></b> | <b>Hg</b> | <b>Ni</b> |
|---------------------------|-----------|-----------|-----------|-----------|-----------|------------------------|-----------|-----------|
| <b>Short-term*</b>        | <b>3</b>  | 7.6       | 34        | 9.4       | <b>19</b> | <b>200</b>             | 1.8       | <b>11</b> |
| <b>Long-term**</b>        | 1.2       | 1.6       | 11        | 3.4       | 2.1       | 2.8                    | 1.0       | 1.8       |

\*Short-term : Compared with one-time observations

\*\*Long-term : Compared with the minimum seasonal survey data

**Table S2.** List of primers used in RT-qPCR for the validation of DEGs from this study.

| Contig ID  | Gene description                                         | Primer sequence (Forward /Reverse)              | Amplicon size (bp) |
|------------|----------------------------------------------------------|-------------------------------------------------|--------------------|
| TBIU005720 | Flavodoxin                                               | GCCATGAGTTCCGATGAGTT<br>CATGGCATCGCAGAAGTAGT    | 102                |
| TBIU014014 | Lectin                                                   | CGGTCGTCTTCCTGTTTGTT<br>TGCTGTCCTTCGGGTAGTAT    | 126                |
| TBIU016896 | ABC transporter G family member 14                       | CGCTCAATCGCTCTCTCAAA<br>GAGGCGTGCTGCATAATAGA    | 104                |
| TBIU026144 | cytochrome P450 CYP13A5                                  | GGTTCCTGCCATTTCCTTGA<br>GACGCCACCAGCATCTT       | 82                 |
| TBIU008580 | ATP-dependent zinc metalloprotease FTSH 2, chloroplastic | CTCATCCCGCATGTCTTACTC<br>CGATGGTGCCATTCTCGTATAG | 89                 |
| TBIU013503 | Ubiquinol oxidase 4, chloroplastic/chromoplastic         | AGCAAGCATACCTGTTCTCC<br>TGGCAGCGACTTCAACAA      | 107                |
| TBIU016365 | Elongation factor 1-alpha                                | TGAGGTTCAAGGCCAAACTC<br>CATGTGCGCAGTCCATCTTGT   | 97                 |
| TBIU021678 | Photosystem II 22 kDa protein, chloroplastic             | CACTACTGCCAGGTGATCTT<br>GCGGCAGAAAGTGTGAATAC    | 115                |
| TBIU012199 | E3 ubiquitin-protein ligase RGLG2                        | ATCGAAGTACCCGCTATCAATC<br>AAATTGTCCCACTCCCTAGC  | 105                |
| TBIU026252 | Ammonium transporter 1 member 1                          | TCAGATGGGACTGCTAGTGA<br>GAACCGGGATTGAAGCCATA    | 104                |
| TBIU012687 | Histone H2AX                                             | ATGCCGCGAGAGACAATAAG<br>TCACAGAGCCGAGAAGTTTG    | 99                 |
| TBIU006309 | Chlorophyll a-b binding protein 5                        | GTTCTCCATGTTCCGGCTTC<br>AACTTGGTGGCGTAGTTCC     | 120                |
| TBIU009507 | Chlorophyll a-b binding protein of LHCII type I          | CTTGGCAACTCTTCCCTCATC<br>GTTGACACGGTATCCCTCAATC | 96                 |
| TBIU018948 | Chlorophyll a-b binding protein type 2                   | ACTACCTCGGCAACCCTAA<br>TTACGCGGTATCCCTCAATC     | 120                |
| TBIU028181 | ABC transporter G family member 31                       | TTCACCTACCTCATGCTCTTTG<br>CGGGAATGCTAGAGAGGTACT | 103                |
| TBIU026067 | phospholipid hydroperoxide glutathione peroxidase        | GATAGTACTGCGGGCTTGTT<br>CGACCAGTGAATCCCATATGTC  | 106                |
| TBIU026428 | DNA repair protein RAD51                                 | CTGCGAAGAGGTGACAGAAT<br>CCACATACAGGTGGTAGTTGAG  | 99                 |

**Table S3.** List of candidate reference genes which are stably expressed in *U. pertusa*.

| Contig ID  | Gene symbol | Gene length (bp) | The best BLASTX hit against NCBI nr DB                                          | Control FPKM | MPS FPKM | MPS-Cd FPKM | MPS-Cu FPKM |
|------------|-------------|------------------|---------------------------------------------------------------------------------|--------------|----------|-------------|-------------|
| TBIU002383 | H1-II       | 234              | Histone H1-II<br>[Source:SWISS;ACC:Q08865]                                      | 37.93        | 47.73    | 46.92       | 59.32       |
| TBIU012687 | H2AX_PICAB  | 1087             | Histone H2AX<br>[Source:SWISS;ACC:P35063]                                       | 175.77       | 143.65   | 200.73      | 200.6       |
| TBIU012997 | H3a         | 626              | Histone H3.3 type a<br>[Source:SWISS;ACC:O15819]                                | 183.62       | 200.98   | 268.24      | 242         |
| TBIU015557 | H4_OLILU    | 1072             | Histone H4<br>[Source:SWISS;ACC:P82888]                                         | 214.37       | 181.26   | 173.32      | 173         |
| TBIU020957 | H2B4_VOLCA  | 477              | Histone H2B.4<br>[Source:SWISS;ACC:P16868]                                      | 117.74       | 149.57   | 236.9       | 202.3       |
| TBIU002688 | TUBA1       | 1898             | Tubulin alpha-1/alpha-2 chain<br>[Source:SWISS;ACC:P11481]                      | 18.66        | 28.51    | 92.35       | 45.72       |
| TBIU009060 | TUBD1       | 315              | Tubulin delta chain<br>[Source:SWISS;ACC:Q8HZV4]                                | 21.24        | 18.17    | 27.95       | 25.05       |
| TBIU014457 | Wbscr22     | 1504             | Probable 18S rRNA (guanine-N(7))-methyltransferase<br>[Source:SWISS;ACC:Q9CY21] | 5.45         | 5.07     | 9.1         | 4.66        |
| TBIU014458 | Wbscr22     | 2064             | Probable 18S rRNA (guanine-N(7))-methyltransferase<br>[Source:SWISS;ACC:Q9CY21] | 31.7         | 38.46    | 45.15       | 36.47       |

**Table S4.** Summary of RNA-seq results for four treatment groups

| Library | Raw data             |                          |                          | Filtered data          |                           |                        |
|---------|----------------------|--------------------------|--------------------------|------------------------|---------------------------|------------------------|
|         | # Reads <sup>1</sup> | Total Bases <sup>2</sup> | Base (>Q30) <sup>3</sup> | # Reads <sup>1</sup>   | Total Bases <sup>2</sup>  | trimmed <sup>4</sup>   |
| Control | 61,173,540           | 6,178,527,540            | 5,672,919,713            | 55,835,312<br>(91.30%) | 5,625,425,236<br>(91.00%) | 56,063,064<br>(91.60%) |
| MPS     | 62,244,430           | 6,286,687,430            | 5,754,207,889            | 56,533,282<br>(90.80%) | 5,695,385,854<br>(90.60%) | 56,794,734<br>(91.20%) |
| MPS-Cd  | 71,130,802           | 7,184,211,002            | 6,590,337,115            | 64,698,188<br>(91.00%) | 6,515,000,835<br>(90.70%) | 62,035,670<br>(91.40%) |
| MPS-Cu  | 67,608,248           | 6,828,433,048            | 6,244,062,288            | 61,070,548<br>(90.30%) | 6,149,791,570<br>(90.10%) | 61,408,464<br>(90.80%) |

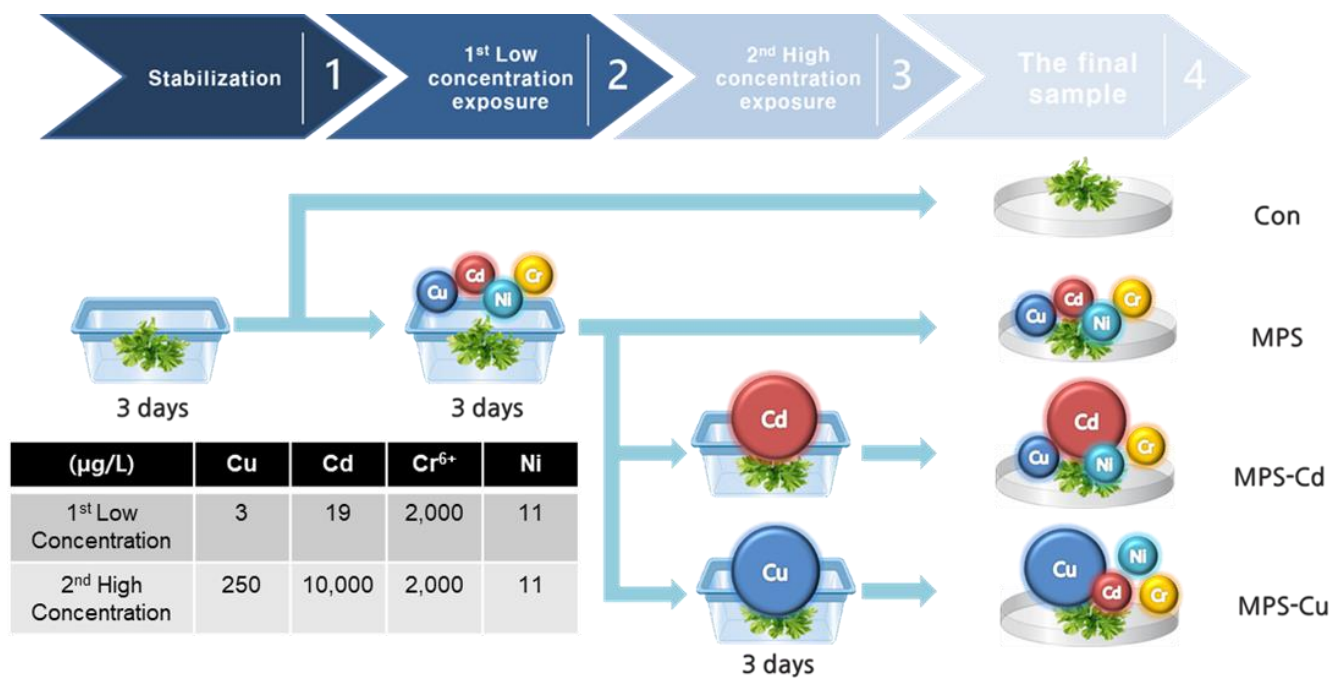

**Figure S1.** Schematic showing the treatment protocol of low and high concentrations of heavy metals in *Ulva pertusa*.

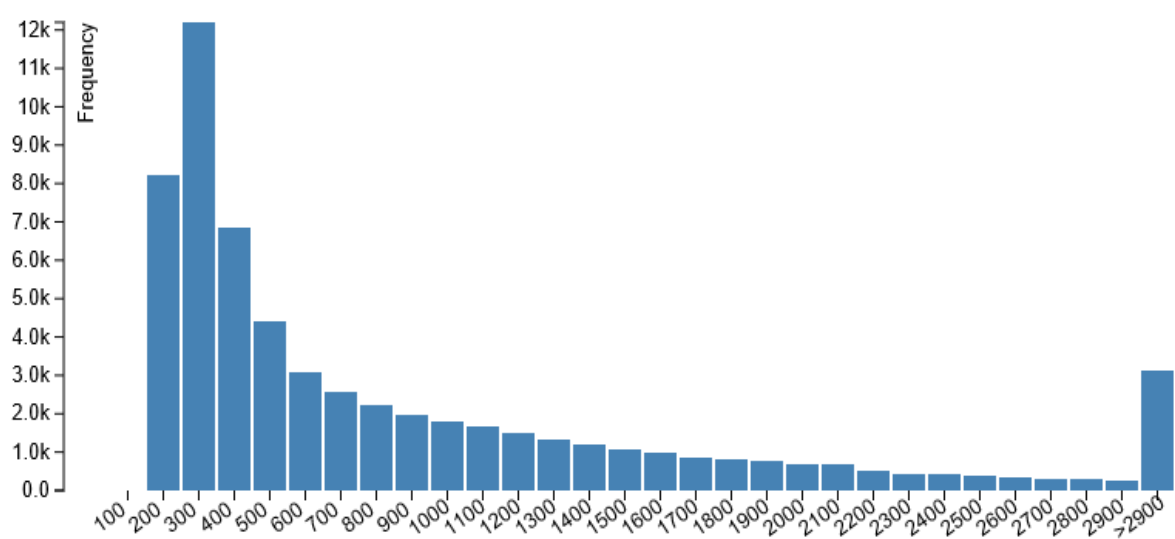

**Figure S2.** Length frequency distribution of assembled unigenes.

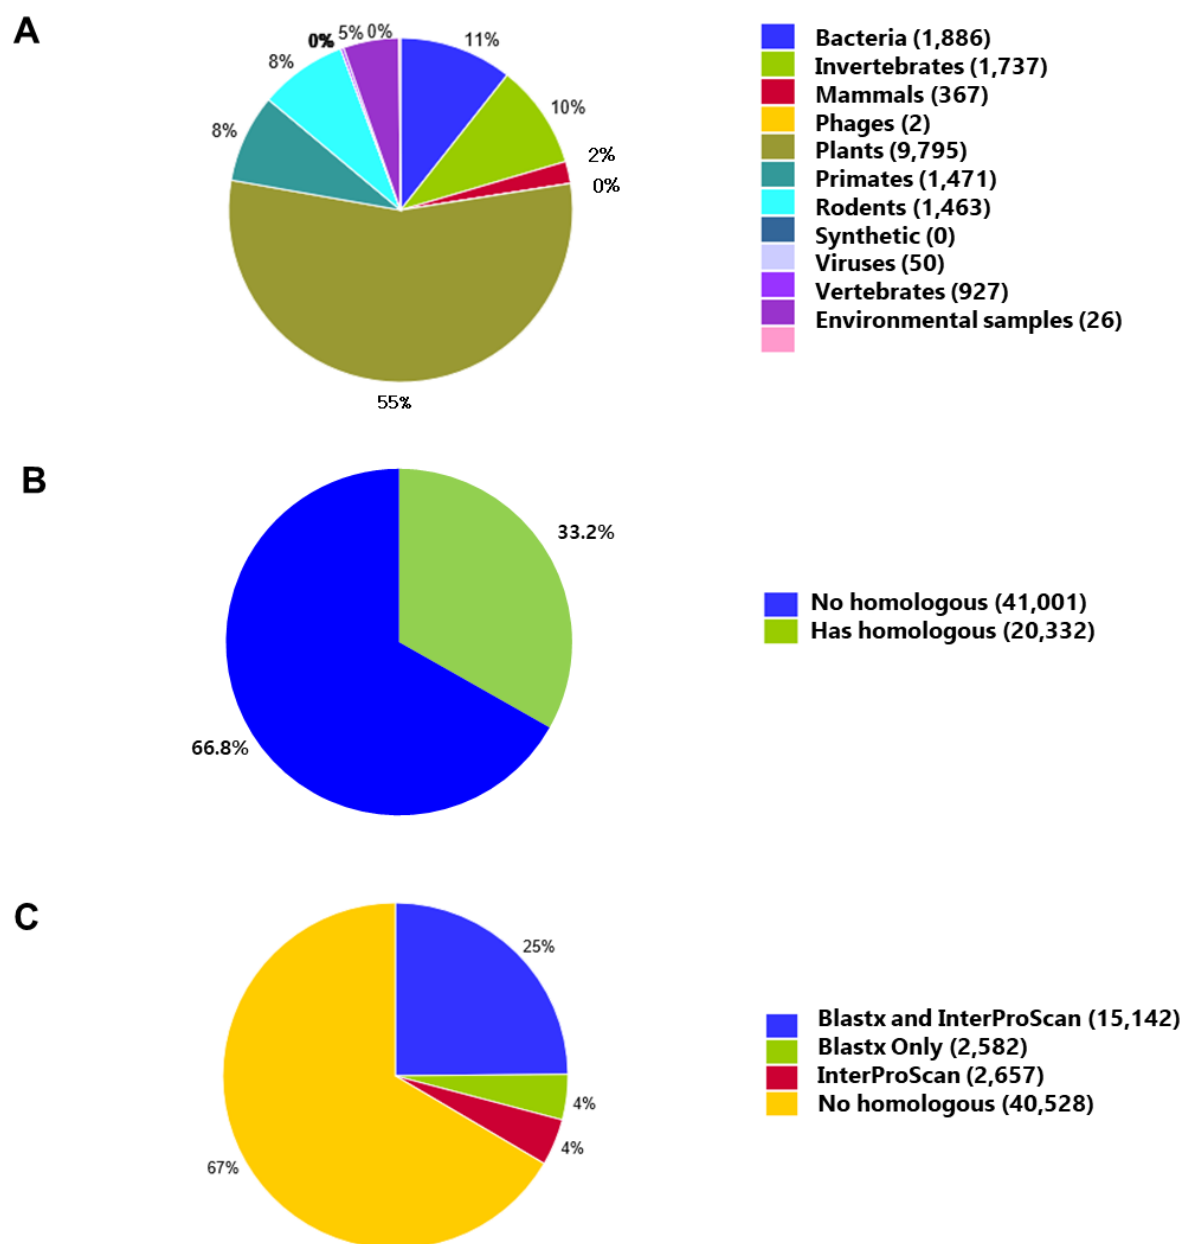

**Figure S3.** A total of 60,909 unigenes were queried against the nonredundant (nr) protein database. (A) DNA sequence-based homology search using Blastx, (B) Protein-based homology search using InterProScan, (C) Consensus between Blastx and InterProScan (cut off: E-value  $> 10^{-5}$ ).

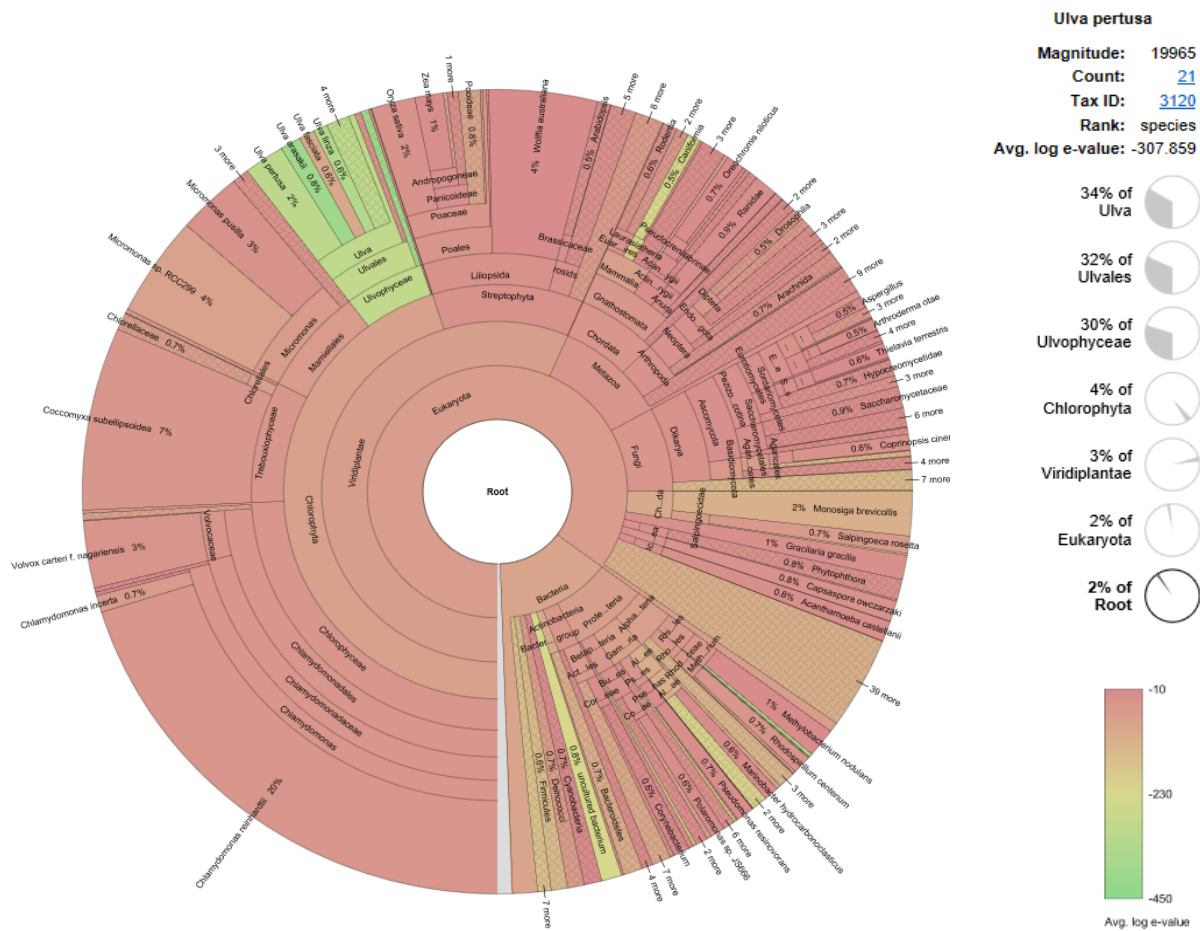

**Figure S4.** Taxonomy of *U. pertusa* using Krona.

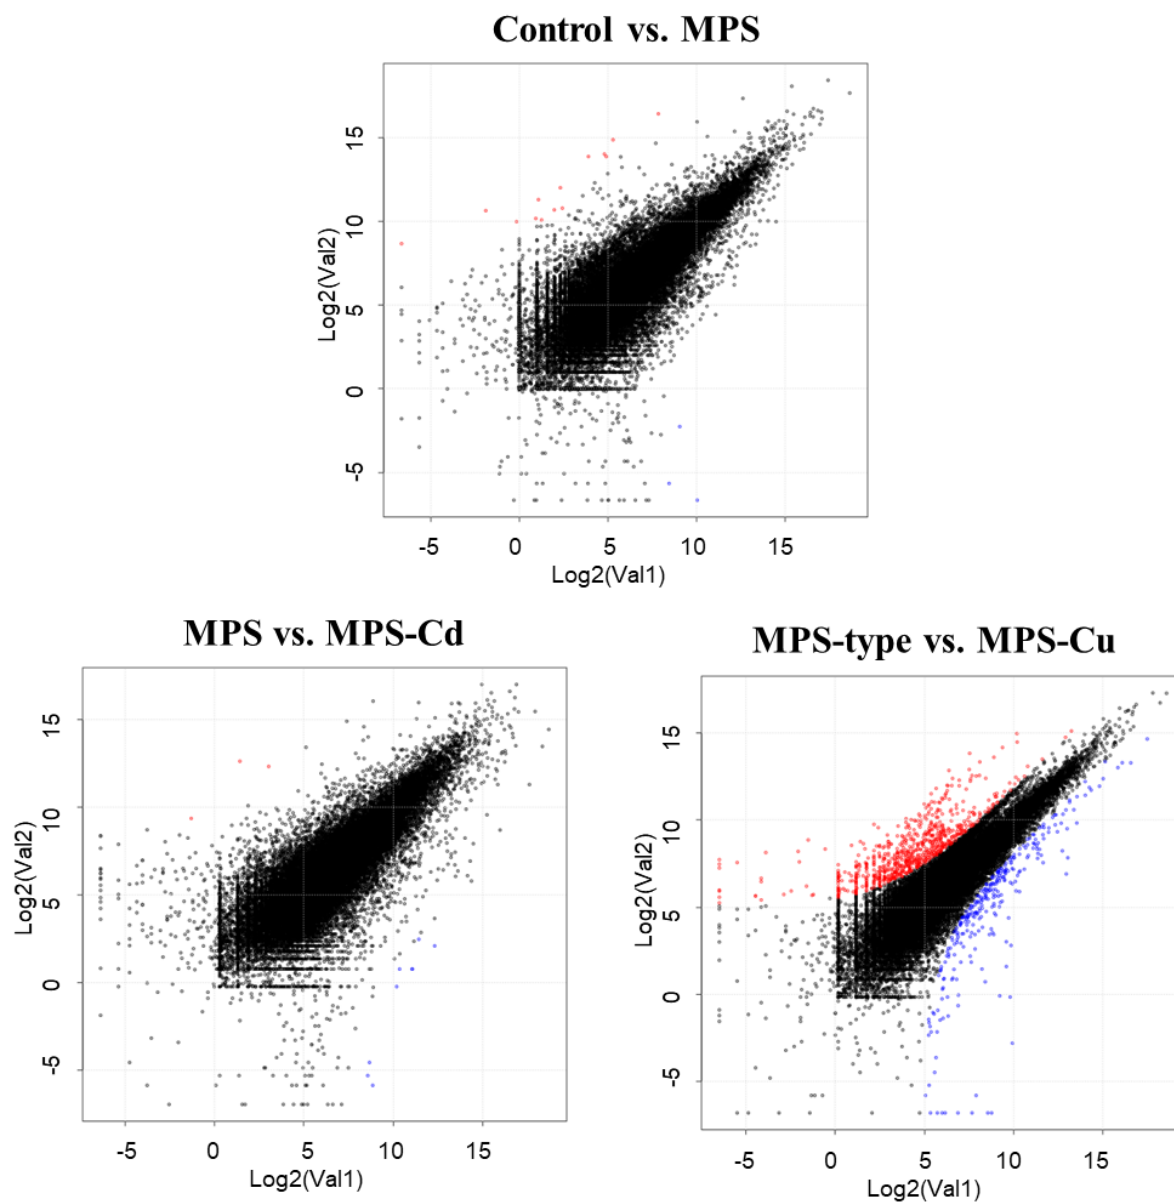

**Figure S5.** Scatter plot of FPKM values between pairs of samples. The red dot means up-regulated expression, and the blue means down-regulated expression. Pearson correlation coefficient was used to compare gene expression levels between samples.

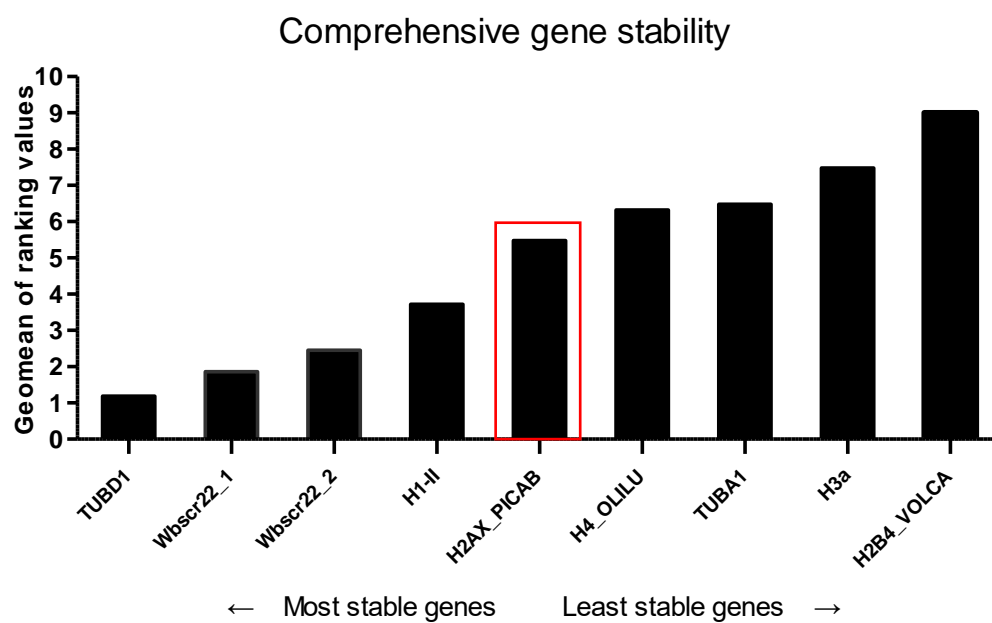

**Figure S6.** Expression stability ranking of the nine candidate reference genes evaluated by RefFinder in *U. pertusa*. The ranking of the nine candidate reference genes was based on a combined analysis of gene expression in the Con, MPS, MPS-Cu, and MPS-Cd conditions.
